# Supplementary material for: Prevention of polycystic ovary syndrome and postmenopausal osteoporosis by inhibiting apoptosis with Shenling Baizhu powder compound
Source: PeerJ. 2022 Oct 28;10:e13939. doi: 10.7717/peerj.13939 (PMC9620975; doi:10.7717/peerj.13939)
Supplement: Supplemental Information 2 — 256 active ingredients after de-duplication. [file peerj-10-13939-s002.xlsx]

## Sheet: Sheet1
Compound Id	Pref Name	CAS	Pubchem ID	Chembl ID	Formula	Smiles	Herb ID	Chinese Pin Yin	Chinese Character	English_name	Latin_name		Latin_name
C0001	(-)-Demecolcine	CAS:477-30-5	CID:220401	CHEMBL312862	C21H25NO5	CN[C@H]1CCc2c(c3c1cc(=O)c(cc3)OC)c(OC)c(c(c2)OC)OC	H0739	Yi Yi Ren	薏苡仁	Jobstears seed	Coix lacryma- jobi var. ma - yuen		Coix lacryma- jobi var. ma - yuen
C0013	Dibenzoylmethane	CAS:120-46-7	CID:8433	CHEMBL371523	C15H12O2	O=C(c1ccccc1)CC(=O)c1ccccc1	H1066	Gan Cao	甘草	Glycyrrhiza inflata	Glycyrrhiza uralensis		Glycyrrhiza uralensis
C0014	Dibutyl Phthalate	CAS:84-74-2	CID:3026	CHEMBL272485	C16H22O4	CCCCOC(=O)c1ccccc1C(=O)OCCCC	H0357	Ren Shen	人参	Ginseng	Panax ginseng		Panax ginseng
C0014	Dibutyl Phthalate	CAS:84-74-2	CID:3026	CHEMBL272485	C16H22O4	CCCCOC(=O)c1ccccc1C(=O)OCCCC	H0140	Lian Zi	莲子	Hindu lotus seed	Nelumbo nucifera		Nelumbo nucifera
C0026	Diosmetin	CAS:520-34-3	CID:5281612	CHEMBL90568	C16H12O6	COc1ccc(cc1O)c1cc(=O)c2c(o1)cc(cc2O)O	H0140	Lian Zi	莲子	Hindu lotus seed	Nelumbo nucifera		Atractylodes macrocephala
C0039	Ellagic Acid	CAS:476-66-4	CID:5281855	CHEMBL6246	C14H6O8	C1=C2C3=C(C(=C1O)O)OC(=O)C4=CC(=C(C(=C43)OC2=O)O)O	H0104	Bai Zhu	白术	Largehead atractylodes	Atractylodes macrocephala		Amomum villosum
C0041	Emodin	CAS:518-82-1	CID:3220	CHEMBL289277	C15H10O5	CC1=CC2=C(C(=C1)O)C(=O)C3=C(C2=O)C=C(C=C3O)O	H1066	Gan Cao	甘草	Glycyrrhiza inflata	Glycyrrhiza uralensis		Wolfiporia cocos
C0044	Enoxolone	CAS:471-53-4	CID:10114	CHEMBL230006	C30H46O4	O=C1C=C2[C@@H]3C[C@](C)(CC[C@]3(C)CC[C@]2([C@]2([C@H]1[C@@]1(C)CC[C@@H](C([C@@H]1CC2)(C)C)O)C)C)C(=O)O	H1066	Gan Cao	甘草	Glycyrrhiza inflata	Glycyrrhiza uralensis		Platycodon grandiflorum
C0045	Epicatechin Gallate	CAS:1257-08-5	CID:107905	CHEMBL36327	C22H18O10	Oc1cc(O)c2c(c1)O[C@@H]([C@@H](C2)OC(=O)c1cc(O)c(c(c1)O)O)c1ccc(c(c1)O)O	H0140	Lian Zi	莲子	Hindu lotus seed	Nelumbo nucifera		Lablab purpureus
C0045	Epicatechin Gallate	CAS:1257-08-5	CID:107905	CHEMBL36327	C22H18O10	Oc1cc(O)c2c(c1)O[C@@H]([C@@H](C2)OC(=O)c1cc(O)c(c(c1)O)O)c1ccc(c(c1)O)O	H1066	Gan Cao	甘草	Glycyrrhiza inflata	Glycyrrhiza uralensis		Dioscorea batatas
C0053	Esculetin	CAS:305-01-1	CID:5281416	CHEMBL244743	C9H6O4	C1=CC(=O)OC2=CC(=C(C=C21)O)O	H0104	Bai Zhu	白术	Largehead atractylodes	Atractylodes macrocephala			Dioscorea batatas	Glycyrrhiza uralensis,	Lablab purpureus,	Nelumbo nucifera,	Panax ginseng,	Platycodon grandiflorum,	Wolfiporia cocos,
C0053	Esculetin	CAS:305-01-1	CID:5281416	CHEMBL244743	C9H6O4	C1=CC(=O)OC2=CC(=C(C=C21)O)O	H1066	Gan Cao	甘草	Glycyrrhiza inflata	Glycyrrhiza uralensis
C0063	Eucalyptol	CAS:470-82-6	CID:2758	CHEMBL1231862	C10H18O	CC1(C2CCC(O1)(CC2)C)C	H0398	Sha Ren	砂仁	Villous amomum	Amomum villosum
C0064	Eugenol	CAS:97-53-0	CID:3314	CHEMBL42710	C10H12O2	COC1=C(C=CC(=C1)CC=C)O	H0357	Ren Shen	人参	Ginseng	Panax ginseng
C0065	Eupafolin	CAS:520-11-6	CID:5317284	CHEMBL172350	C16H12O7	COc1c(O)cc2c(c1O)c(=O)cc(o2)c1ccc(c(c1)O)O	H0357	Ren Shen	人参	Ginseng	Panax ginseng
C0072	Farnesol	CAS:4602-84-0	CID:445070	CHEMBL25308	C15H26O	CC(=CCCC(=CCCC(=CCO)C)C)C	H0357	Ren Shen	人参	Ginseng	Panax ginseng
C0072	Farnesol	CAS:4602-84-0	CID:445070	CHEMBL25308	C15H26O	CC(=CCCC(=CCCC(=CCO)C)C)C	H0140	Lian Zi	莲子	Hindu lotus seed	Nelumbo nucifera
C0073	Ferulic Acid	CAS:1135-24-6	CID:445858	CHEMBL32749	C10H10O4	COc1cc(/C=C/C(=O)O)ccc1O	H0140	Lian Zi	莲子	Hindu lotus seed	Nelumbo nucifera
C0074	Fisetin	CAS:528-48-3	CID:5281614	CHEMBL31574	C15H10O6	C1=CC(=C(C=C1C2=C(C(=O)C3=C(O2)C=C(C=C3)O)O)O)O	H1066	Gan Cao	甘草	Glycyrrhiza inflata	Glycyrrhiza uralensis
C0083	Formononetin	CAS:485-72-3	CID:5280378	CHEMBL242341	C16H12O4	COC1=CC=C(C=C1)C2=COC3=C(C2=O)C=CC(=C3)O	H1066	Gan Cao	甘草	Glycyrrhiza inflata	Glycyrrhiza uralensis
C0089	Galangin	CAS:548-83-4	CID:5281616	CHEMBL309490	C15H10O5	C1=CC=C(C=C1)C2=C(C(=O)C3=C(C=C(C=C3O2)O)O)O	H1066	Gan Cao	甘草	Glycyrrhiza inflata	Glycyrrhiza uralensis
C0090	Gallic Acid	CAS:149-91-7	CID:370	CHEMBL288114	C7H6O5	C1=C(C=C(C(=C1O)O)O)C(=O)O	H0104	Bai Zhu	白术	Largehead atractylodes	Atractylodes macrocephala
C0090	Gallic Acid	CAS:149-91-7	CID:370	CHEMBL288114	C7H6O5	C1=C(C=C(C(=C1O)O)O)C(=O)O	H0140	Lian Zi	莲子	Hindu lotus seed	Nelumbo nucifera
C0090	Gallic Acid	CAS:149-91-7	CID:370	CHEMBL288114	C7H6O5	C1=C(C=C(C(=C1O)O)O)C(=O)O	H1066	Gan Cao	甘草	Glycyrrhiza inflata	Glycyrrhiza uralensis
C0101	Genistein	CAS:446-72-0	CID:5280961	CHEMBL44	C15H10O5	C1=CC(=CC=C1C2=COC3=CC(=CC(=C3C2=O)O)O)O	H1066	Gan Cao	甘草	Glycyrrhiza inflata	Glycyrrhiza uralensis
C0102	Geraniol	CAS:106-24-1	CID:637566	CHEMBL25719	C10H18O	CC(=CCCC(=CCO)C)C	H0140	Lian Zi	莲子	Hindu lotus seed	Nelumbo nucifera
C0104	Ginsenoside Rh2	CAS:78214-33-2	CID:119307	CHEMBL1783834	C36H62O8	CC(=CCCC(C)(C1CCC2(C1C(CC3C2(CCC4C3(CCC(C4(C)C)OC5C(C(C(C(O5)CO)O)O)O)C)C)O)C)O)C	H0357	Ren Shen	人参	Ginseng	Panax ginseng
C0105	Glabridin		CID:124052	CHEMBL480477	C20H20O4	Oc1ccc(c(c1)O)[C@@H]1COc2c(C1)ccc1c2C=CC(O1)(C)C	H1066	Gan Cao	甘草	Glycyrrhiza inflata	Glycyrrhiza uralensis
C0108	Glycybenzofuran	CAS:1253641-15-4	CID:46934435	CHEMBL1223582	C21H22O5	COc1c(CC=C(C)C)c(O)cc(c1c1oc2c(c1C)ccc(c2)O)O	H1066	Gan Cao	甘草	Glycyrrhiza inflata	Glycyrrhiza uralensis
C0109	Glycyrol	CAS:23013-84-5	CID:5320083	CHEMBL132695	C21H18O6	COc1c(CC=C(C)C)c(O)cc2c1c1oc3c(c1c(=O)o2)ccc(c3)O	H1066	Gan Cao	甘草	Glycyrrhiza inflata	Glycyrrhiza uralensis
C0110	Glycyrrhizin	CAS:103000-77-7	CID:14982	CHEMBL441687	C42H62O16	CC1(C2CCC3(C(C2(CCC1OC4C(C(C(C(O4)C(=O)O)O)O)OC5C(C(C(C(O5)C(=O)O)O)O)O)C)C(=O)C=C6C3(CCC7(C6CC(CC7)(C)C(=O)O)C)C)C)C	H1066	Gan Cao	甘草	Glycyrrhiza inflata	Glycyrrhiza uralensis
C0114	(-)-Epicatechin		CID:72276	CHEMBL583912	C15H14O6	C1C(C(OC2=CC(=CC(=C21)O)O)C3=CC(=C(C=C3)O)O)O	H0104	Bai Zhu	白术	Largehead atractylodes	Atractylodes macrocephala
C0114	(-)-Epicatechin		CID:72276	CHEMBL583912	C15H14O6	C1C(C(OC2=CC(=CC(=C21)O)O)C3=CC(=C(C=C3)O)O)O	H1066	Gan Cao	甘草	Glycyrrhiza inflata	Glycyrrhiza uralensis
C0124	Hispidulin	CAS:1447-88-7	CID:5281628	CHEMBL293776	C16H12O6	COc1c(O)cc2c(c1O)c(=O)cc(o2)c1ccc(cc1)O	H1066	Gan Cao	甘草	Glycyrrhiza inflata	Glycyrrhiza uralensis
C0133	Hyperoside	CAS:482-36-0	CID:5281643	CHEMBL251254	C21H20O12	C1=CC(=C(C=C1C2=C(C(=O)C3=C(C=C(C=C3O2)O)O)OC4C(C(C(C(O4)CO)O)O)O)O)O	H0140	Lian Zi	莲子	Hindu lotus seed	Nelumbo nucifera
C0145	Inositol	CAS:87-89-8	CID:UNK	CHEMBL1222251	C6H12O6	O[C@@H]1[C@H](O)[C@H](O)[C@H]([C@@H]([C@H]1O)O)O	H0140	Lian Zi	莲子	Hindu lotus seed	Nelumbo nucifera
C0148	Isoeugenol	CAS:97-54-1	CID:853433	CHEMBL193598	C10H12O2	CC=CC1=CC(=C(C=C1)O)OC	H0104	Bai Zhu	白术	Largehead atractylodes	Atractylodes macrocephala
C0152	Isoliquiritigenin	CAS:961-29-5	CID:638278	CHEMBL129795	C15H12O4	C1=CC(=CC=C1C=CC(=O)C2=C(C=C(C=C2)O)O)O	H1066	Gan Cao	甘草	Glycyrrhiza inflata	Glycyrrhiza uralensis
C0153	Isoorientin	CAS:4261-42-1	CID:114776	CHEMBL239559	C21H20O11	C1=CC(=C(C=C1C2=CC(=O)C3=C(O2)C=C(C(=C3O)C4C(C(C(C(O4)CO)O)O)O)O)O)O	H0140	Lian Zi	莲子	Hindu lotus seed	Nelumbo nucifera
C0156	Isoquercetin	CAS:482-35-9	CID:5280804	CHEMBL250450	C21H20O12	OC[C@H]1O[C@@H](Oc2c(oc3c(c2=O)c(O)cc(c3)O)c2ccc(c(c2)O)O)[C@@H]([C@H]([C@@H]1O)O)O	H0104	Bai Zhu	白术	Largehead atractylodes	Atractylodes macrocephala
C0156	Isoquercetin	CAS:482-35-9	CID:5280804	CHEMBL250450	C21H20O12	OC[C@H]1O[C@@H](Oc2c(oc3c(c2=O)c(O)cc(c3)O)c2ccc(c(c2)O)O)[C@@H]([C@H]([C@@H]1O)O)O	H0140	Lian Zi	莲子	Hindu lotus seed	Nelumbo nucifera
C0156	Isoquercetin	CAS:482-35-9	CID:5280804	CHEMBL250450	C21H20O12	OC[C@H]1O[C@@H](Oc2c(oc3c(c2=O)c(O)cc(c3)O)c2ccc(c(c2)O)O)[C@@H]([C@H]([C@@H]1O)O)O	H1066	Gan Cao	甘草	Glycyrrhiza inflata	Glycyrrhiza uralensis
C0156	Isoquercetin	CAS:482-35-9	CID:5280804	CHEMBL250450	C21H20O12	OC[C@H]1O[C@@H](Oc2c(oc3c(c2=O)c(O)cc(c3)O)c2ccc(c(c2)O)O)[C@@H]([C@H]([C@@H]1O)O)O	H0398	Sha Ren	砂仁	Villous amomum	Amomum villosum
C0157	Isorhamnetin	CAS:480-19-3	CID:5281654	CHEMBL379064	C16H12O7	COC1=C(C=CC(=C1)C2=C(C(=O)C3=C(C=C(C=C3O2)O)O)O)O	H0140	Lian Zi	莲子	Hindu lotus seed	Nelumbo nucifera
C0159	Isovitexin	CAS:38953-85-4	CID:162350	CHEMBL465360	C21H20O10	C1=CC(=CC=C1C2=CC(=O)C3=C(O2)C=C(C(=C3O)C4C(C(C(C(O4)CO)O)O)O)O)O	H0357	Ren Shen	人参	Ginseng	Panax ginseng
C0159	Isovitexin	CAS:38953-85-4	CID:162350	CHEMBL465360	C21H20O10	C1=CC(=CC=C1C2=CC(=O)C3=C(O2)C=C(C(=C3O)C4C(C(C(C(O4)CO)O)O)O)O)O	H0140	Lian Zi	莲子	Hindu lotus seed	Nelumbo nucifera
C0164	Kaempferol	CAS:520-18-3	CID:5280863	CHEMBL150	C15H10O6	C1=CC(=CC=C1C2=C(C(=O)C3=C(C=C(C=C3O2)O)O)O)O	H0357	Ren Shen	人参	Ginseng	Panax ginseng
C0164	Kaempferol	CAS:520-18-3	CID:5280863	CHEMBL150	C15H10O6	C1=CC(=CC=C1C2=C(C(=O)C3=C(C=C(C=C3O2)O)O)O)O	H0140	Lian Zi	莲子	Hindu lotus seed	Nelumbo nucifera
C0164	Kaempferol	CAS:520-18-3	CID:5280863	CHEMBL150	C15H10O6	C1=CC(=CC=C1C2=C(C(=O)C3=C(C=C(C=C3O2)O)O)O)O	H1066	Gan Cao	甘草	Glycyrrhiza inflata	Glycyrrhiza uralensis
C0181	Levomenthol	CAS:2216-51-5	CID:16666	CHEMBL470670	C10H20O	CC1CCC(C(C1)O)C(C)C	H0104	Bai Zhu	白术	Largehead atractylodes	Atractylodes macrocephala
C0181	Levomenthol	CAS:2216-51-5	CID:16666	CHEMBL470670	C10H20O	CC1CCC(C(C1)O)C(C)C	H0398	Sha Ren	砂仁	Villous amomum	Amomum villosum
C0185	Licoagrochacone A		CID:5318998	CHEMBL139702	C21H22O4	CC(C)(C=C)C1=C(C=C(C(=C1)C=CC(=O)C2=CC=C(C=C2)O)OC)O	H1066	Gan Cao	甘草	Glycyrrhiza inflata	Glycyrrhiza uralensis
C0186	Ligustilide	CAS:4431-01-0	CID:5319022	CHEMBL481246	C12H14O2	CCC/C=C/1\OC(=O)C2=C1CCC=C2	H1053	Fu Ling	茯苓	Indian bread	Wolfiporia cocos
C0188	Linalool	CAS:78-70-6	CID:6549	CHEMBL25306	C10H18O	CC(=CCCC(C)(C=C)O)C	H0140	Lian Zi	莲子	Hindu lotus seed	Nelumbo nucifera
C0188	Linalool	CAS:78-70-6	CID:6549	CHEMBL25306	C10H18O	CC(=CCCC(C)(C=C)O)C	H0398	Sha Ren	砂仁	Villous amomum	Amomum villosum
C0189	Linoleic Acid	CAS:60-33-3	CID:5280450	CHEMBL267476	C18H32O2	CCCCC/C=C\C/C=C\CCCCCCCC(=O)O	H0357	Ren Shen	人参	Ginseng	Panax ginseng
C0189	Linoleic Acid	CAS:60-33-3	CID:5280450	CHEMBL267476	C18H32O2	CCCCC/C=C\C/C=C\CCCCCCCC(=O)O	H0104	Bai Zhu	白术	Largehead atractylodes	Atractylodes macrocephala
C0189	Linoleic Acid	CAS:60-33-3	CID:5280450	CHEMBL267476	C18H32O2	CCCCC/C=C\C/C=C\CCCCCCCC(=O)O	H0140	Lian Zi	莲子	Hindu lotus seed	Nelumbo nucifera
C0190	Linolenic Acid	CAS:463-40-1	CID:5280934	CHEMBL8739	C18H30O2	CCC=CCC=CCC=CCCCCCCCC(=O)O	H0357	Ren Shen	人参	Ginseng	Panax ginseng
C0190	Linolenic Acid	CAS:463-40-1	CID:5280934	CHEMBL8739	C18H30O2	CCC=CCC=CCC=CCCCCCCCC(=O)O	H0140	Lian Zi	莲子	Hindu lotus seed	Nelumbo nucifera
C0193	Liquiritin	CAS:551-15-5	CID:503737	CHEMBL511995	C21H22O9	C1C(OC2=C(C1=O)C=CC(=C2)O)C3=CC=C(C=C3)OC4C(C(C(C(O4)CO)O)O)O	H1066	Gan Cao	甘草	Glycyrrhiza inflata	Glycyrrhiza uralensis
C0199	Luteolin	CAS:491-70-3	CID:5280445	CHEMBL151	C15H10O6	C1=CC(=C(C=C1C2=CC(=O)C3=C(C=C(C=C3O2)O)O)O)O	H0104	Bai Zhu	白术	Largehead atractylodes	Atractylodes macrocephala
C0199	Luteolin	CAS:491-70-3	CID:5280445	CHEMBL151	C15H10O6	C1=CC(=C(C=C1C2=CC(=O)C3=C(C=C(C=C3O2)O)O)O)O	H0140	Lian Zi	莲子	Hindu lotus seed	Nelumbo nucifera
C0204	Malonic Acid	CAS:141-82-2	CID:867	CHEMBL7942	C3H4O4	OC(=O)CC(=O)O	H0357	Ren Shen	人参	Ginseng	Panax ginseng
C0228	M-Xylene	CAS:108-38-3	CID:7929	CHEMBL286727	C8H10	CC1=CC(=CC=C1)C	H0357	Ren Shen	人参	Ginseng	Panax ginseng
C0229	Myricetin	CAS:529-44-2	CID:5281672	CHEMBL164	C15H10O8	C1=C(C=C(C(=C1O)O)O)C2=C(C(=O)C3=C(C=C(C=C3O2)O)O)O	H0140	Lian Zi	莲子	Hindu lotus seed	Nelumbo nucifera
C0231	Myristic Acid	CAS:544-63-8	CID:11005	CHEMBL111077	C14H28O2	CCCCCCCCCCCCCC(=O)O	H0357	Ren Shen	人参	Ginseng	Panax ginseng
C0231	Myristic Acid	CAS:544-63-8	CID:11005	CHEMBL111077	C14H28O2	CCCCCCCCCCCCCC(=O)O	H0140	Lian Zi	莲子	Hindu lotus seed	Nelumbo nucifera
C0240	Naphthalene		CID:931	CHEMBL16293	C10H8	C1=CC=C2C=CC=CC2=C1	H0357	Ren Shen	人参	Ginseng	Panax ginseng
C0240	Naphthalene		CID:931	CHEMBL16293	C10H8	C1=CC=C2C=CC=CC2=C1	H0104	Bai Zhu	白术	Largehead atractylodes	Atractylodes macrocephala
C0240	Naphthalene		CID:931	CHEMBL16293	C10H8	C1=CC=C2C=CC=CC2=C1	H0140	Lian Zi	莲子	Hindu lotus seed	Nelumbo nucifera
C0242	Naringenin	CAS:480-41-1	CID:439246	CHEMBL9352	C15H12O5	Oc1ccc(cc1)[C@@H]1CC(=O)c2c(O1)cc(cc2O)O	H1066	Gan Cao	甘草	Glycyrrhiza inflata	Glycyrrhiza uralensis
C0245	Niacin	CAS:59-67-6	CID:938	CHEMBL573	C6H5NO2	C1=CC(=CN=C1)C(=O)O	H0357	Ren Shen	人参	Ginseng	Panax ginseng
C0253	Norathyriol	CAS:3542-72-1	CID:5281656	CHEMBL187265	C13H8O6	Oc1cc(O)c2c(c1)oc1c(c2=O)cc(c(c1)O)O	H0140	Lian Zi	莲子	Hindu lotus seed	Nelumbo nucifera
C0258	Octanoic Acid		CID:379	CHEMBL324846	C8H16O2	CCCCCCCC(=O)O	H0357	Ren Shen	人参	Ginseng	Panax ginseng
C0258	Octanoic Acid		CID:379	CHEMBL324846	C8H16O2	CCCCCCCC(=O)O	H1053	Fu Ling	茯苓	Indian bread	Wolfiporia cocos
C0259	Octanol	CAS:111-87-5	CID:957	CHEMBL26215	C8H18O	CCCCCCCCO	H0357	Ren Shen	人参	Ginseng	Panax ginseng
C0262	Oleanolic_Acid		CID:10494	CHEMBL168	C30H48O3	CC1(CCC2(CCC3(C(=CCC4C3(CCC5C4(CCC(C5(C)C)O)C)C)C2C1)C)C(=O)O)C	H0357	Ren Shen	人参	Ginseng	Panax ginseng
C0262	Oleanolic_Acid		CID:10494	CHEMBL168	C30H48O3	CC1(CCC2(CCC3(C(=CCC4C3(CCC5C4(CCC(C5(C)C)O)C)C)C2C1)C)C(=O)O)C	H1066	Gan Cao	甘草	Glycyrrhiza inflata	Glycyrrhiza uralensis
C0262	Oleanolic_Acid		CID:10494	CHEMBL168	C30H48O3	CC1(CCC2(CCC3(C(=CCC4C3(CCC5C4(CCC(C5(C)C)O)C)C)C2C1)C)C(=O)O)C	H0036	Jie Geng	桔梗	Balloonflower	Platycodon grandiflorum
C0263	Oleic Acid	CAS:112-80-1	CID:445639	CHEMBL8659	C18H34O2	CCCCCCCCC=CCCCCCCCC(=O)O	H0357	Ren Shen	人参	Ginseng	Panax ginseng
C0263	Oleic Acid	CAS:112-80-1	CID:445639	CHEMBL8659	C18H34O2	CCCCCCCCC=CCCCCCCCC(=O)O	H0104	Bai Zhu	白术	Largehead atractylodes	Atractylodes macrocephala
C0263	Oleic Acid	CAS:112-80-1	CID:445639	CHEMBL8659	C18H34O2	CCCCCCCCC=CCCCCCCCC(=O)O	H0140	Lian Zi	莲子	Hindu lotus seed	Nelumbo nucifera
C0263	Oleic Acid	CAS:112-80-1	CID:445639	CHEMBL8659	C18H34O2	CCCCCCCCC=CCCCCCCCC(=O)O	H0739	Yi Yi Ren	薏苡仁	Jobstears seed	Coix lacryma- jobi var. ma - yuen
C0277	O-Xylene	CAS:95-47-6	CID:7237	CHEMBL45005	C8H10	CC1=CC=CC=C1C	H0357	Ren Shen	人参	Ginseng	Panax ginseng
C0283	Paeonol	CAS:552-41-0	CID:11092	CHEMBL1079227	C9H10O3	CC(=O)C1=C(C=C(C=C1)OC)O	H0357	Ren Shen	人参	Ginseng	Panax ginseng
C0285	Palmitic Acid	CAS:57-10-3	CID:985	CHEMBL82293	C16H32O2	CCCCCCCCCCCCCCCC(=O)O	H0357	Ren Shen	人参	Ginseng	Panax ginseng
C0285	Palmitic Acid	CAS:57-10-3	CID:985	CHEMBL82293	C16H32O2	CCCCCCCCCCCCCCCC(=O)O	H1053	Fu Ling	茯苓	Indian bread	Wolfiporia cocos
C0285	Palmitic Acid	CAS:57-10-3	CID:985	CHEMBL82293	C16H32O2	CCCCCCCCCCCCCCCC(=O)O	H0104	Bai Zhu	白术	Largehead atractylodes	Atractylodes macrocephala
C0285	Palmitic Acid	CAS:57-10-3	CID:985	CHEMBL82293	C16H32O2	CCCCCCCCCCCCCCCC(=O)O	H0140	Lian Zi	莲子	Hindu lotus seed	Nelumbo nucifera
C0285	Palmitic Acid	CAS:57-10-3	CID:985	CHEMBL82293	C16H32O2	CCCCCCCCCCCCCCCC(=O)O	H0398	Sha Ren	砂仁	Villous amomum	Amomum villosum
C0287	Palmitoleic Acid	CAS:373-49-9	CID:445638	CHEMBL453509	C16H30O2	CCCCCC/C=C\CCCCCCCC(=O)O	H0357	Ren Shen	人参	Ginseng	Panax ginseng
C0291	Paraben		CID:3702506	CHEMBL441343	C7H6O3	Oc1ccc(cc1)C(=O)O	H0357	Ren Shen	人参	Ginseng	Panax ginseng
C0291	Paraben		CID:3702506	CHEMBL441343	C7H6O3	Oc1ccc(cc1)C(=O)O	H0140	Lian Zi	莲子	Hindu lotus seed	Nelumbo nucifera
C0291	Paraben		CID:3702506	CHEMBL441343	C7H6O3	Oc1ccc(cc1)C(=O)O	H1066	Gan Cao	甘草	Glycyrrhiza inflata	Glycyrrhiza uralensis
C0300	Phenol		CID:996	CHEMBL14060	C6H6O	Oc1ccccc1	H0104	Bai Zhu	白术	Largehead atractylodes	Atractylodes macrocephala
C0308	Piceatannol	CAS:10083-24-6	CID:667639	CHEMBL69863	C14H12O4	Oc1cc(/C=C/c2ccc(c(c2)O)O)cc(c1)O	H0357	Ren Shen	人参	Ginseng	Panax ginseng
C0312	Pinocembrin	CAS:480-39-7	CID:68071	CHEMBL399910	C15H12O4	Oc1cc2O[C@@H](CC(=O)c2c(c1)O)c1ccccc1	H1066	Gan Cao	甘草	Glycyrrhiza inflata	Glycyrrhiza uralensis
C0333	Protocatechuic Acid	CAS:99-50-3	CID:72	CHEMBL37537	C7H6O4	C1=CC(=C(C=C1C(=O)O)O)O	H0357	Ren Shen	人参	Ginseng	Panax ginseng
C0333	Protocatechuic Acid	CAS:99-50-3	CID:72	CHEMBL37537	C7H6O4	C1=CC(=C(C=C1C(=O)O)O)O	H1053	Fu Ling	茯苓	Indian bread	Wolfiporia cocos
C0333	Protocatechuic Acid	CAS:99-50-3	CID:72	CHEMBL37537	C7H6O4	C1=CC(=C(C=C1C(=O)O)O)O	H0140	Lian Zi	莲子	Hindu lotus seed	Nelumbo nucifera
C0333	Protocatechuic Acid	CAS:99-50-3	CID:72	CHEMBL37537	C7H6O4	C1=CC(=C(C=C1C(=O)O)O)O	H1066	Gan Cao	甘草	Glycyrrhiza inflata	Glycyrrhiza uralensis
C0340	Putrescine	CAS:110-60-1	CID:1045	CHEMBL46257	C4H12N2	C(CCN)CN	H0357	Ren Shen	人参	Ginseng	Panax ginseng
C0343	Pyrene		CID:31423	CHEMBL279564	C16H10	C1=CC2=C3C(=C1)C=CC4=CC=CC(=C43)C=C2	H0104	Bai Zhu	白术	Largehead atractylodes	Atractylodes macrocephala
C0344	Pyridine		CID:1049	CHEMBL266158	C5H5N	c1cccnc1	H0357	Ren Shen	人参	Ginseng	Panax ginseng
C0352	Quercetin	CAS:117-39-5	CID:5280343	CHEMBL50	C15H10O7	C1=CC(=C(C=C1C2=C(C(=O)C3=C(C=C(C=C3O2)O)O)O)O)O	H0357	Ren Shen	人参	Ginseng	Panax ginseng
C0352	Quercetin	CAS:117-39-5	CID:5280343	CHEMBL50	C15H10O7	C1=CC(=C(C=C1C2=C(C(=O)C3=C(C=C(C=C3O2)O)O)O)O)O	H0140	Lian Zi	莲子	Hindu lotus seed	Nelumbo nucifera
C0352	Quercetin	CAS:117-39-5	CID:5280343	CHEMBL50	C15H10O7	C1=CC(=C(C=C1C2=C(C(=O)C3=C(C=C(C=C3O2)O)O)O)O)O	H0398	Sha Ren	砂仁	Villous amomum	Amomum villosum
C0354	Quercitrin	CAS:522-12-3	CID:5280459	CHEMBL82242	C21H20O11	Oc1cc(O)c2c(c1)oc(c(c2=O)O[C@@H]1O[C@@H](C)[C@@H]([C@H]([C@H]1O)O)O)c1ccc(c(c1)O)O	H0398	Sha Ren	砂仁	Villous amomum	Amomum villosum
C0363	Resveratrol	CAS:501-36-0	CID:445154	CHEMBL165	C14H12O3	C1=CC(=CC=C1C=CC2=CC(=CC(=C2)O)O)O	H0357	Ren Shen	人参	Ginseng	Panax ginseng
C0365	Retinal		CID:638015	CHEMBL81379	C20H28O	CC1=C(C(CCC1)(C)C)C=CC(=CC=CC(=CC=O)C)C	H0357	Ren Shen	人参	Ginseng	Panax ginseng
C0371	Riboflavin		CID:493570	CHEMBL1534	C17H20N4O6	OC[C@H]([C@H]([C@H](Cn1c2cc(C)c(cc2nc2c1nc(=O)nc2O)C)O)O)O	H0357	Ren Shen	人参	Ginseng	Panax ginseng
C0377	Rutin	CAS:153-18-4	CID:5280805	CHEMBL226335	C27H30O16	CC1C(C(C(C(O1)OCC2C(C(C(C(O2)OC3=C(OC4=CC(=CC(=C4C3=O)O)O)C5=CC(=C(C=C5)O)O)O)O)O)O)O)O	H0140	Lian Zi	莲子	Hindu lotus seed	Nelumbo nucifera
C0377	Rutin	CAS:153-18-4	CID:5280805	CHEMBL226335	C27H30O16	CC1C(C(C(C(O1)OCC2C(C(C(C(O2)OC3=C(OC4=CC(=CC(=C4C3=O)O)O)C5=CC(=C(C=C5)O)O)O)O)O)O)O)O	H1066	Gan Cao	甘草	Glycyrrhiza inflata	Glycyrrhiza uralensis
C0377	Rutin	CAS:153-18-4	CID:5280805	CHEMBL226335	C27H30O16	CC1C(C(C(C(O1)OCC2C(C(C(C(O2)OC3=C(OC4=CC(=CC(=C4C3=O)O)O)C5=CC(=C(C=C5)O)O)O)O)O)O)O)O	H0398	Sha Ren	砂仁	Villous amomum	Amomum villosum
C0383	Salicylic Acid	CAS:69-72-7	CID:338	CHEMBL424	C7H6O3	C1=CC=C(C(=C1)C(=O)O)O	H0357	Ren Shen	人参	Ginseng	Panax ginseng
C0383	Salicylic Acid	CAS:69-72-7	CID:338	CHEMBL424	C7H6O3	C1=CC=C(C(=C1)C(=O)O)O	H0140	Lian Zi	莲子	Hindu lotus seed	Nelumbo nucifera
C0390	Schisandrin B	CAS:61281-37-6	CID:108130	CHEMBL479488	C23H28O6	COc1cc2CC(C)C(C)Cc3c(c2c(c1OC)OC)c(OC)c1c(c3)OCO1	H0357	Ren Shen	人参	Ginseng	Panax ginseng
C0407	Sinapinate		CID:637775	CHEMBL109341	C11H12O5	COC1=CC(=CC(=C1O)OC)C=CC(=O)O	H0140	Lian Zi	莲子	Hindu lotus seed	Nelumbo nucifera
C0412	Spermidine	CAS:124-20-9	CID:1102	CHEMBL19612	C7H19N3	NCCCNCCCCN	H0357	Ren Shen	人参	Ginseng	Panax ginseng
C0416	Stearic Acid	CAS:57-11-4	CID:5281	CHEMBL46403	C18H36O2	CCCCCCCCCCCCCCCCCC(=O)O	H0357	Ren Shen	人参	Ginseng	Panax ginseng
C0416	Stearic Acid	CAS:57-11-4	CID:5281	CHEMBL46403	C18H36O2	CCCCCCCCCCCCCCCCCC(=O)O	H0140	Lian Zi	莲子	Hindu lotus seed	Nelumbo nucifera
C0416	Stearic Acid	CAS:57-11-4	CID:5281	CHEMBL46403	C18H36O2	CCCCCCCCCCCCCCCCCC(=O)O	H0398	Sha Ren	砂仁	Villous amomum	Amomum villosum
C0420	Succinic Acid	CAS:110-15-6	CID:1110	CHEMBL576	C4H6O4	C(CC(=O)O)C(=O)O	H0357	Ren Shen	人参	Ginseng	Panax ginseng
C0423	Syringin	CAS:118-34-3	CID:5316860	CHEMBL250872	C17H24O9	OC/C=C/c1cc(OC)c(c(c1)OC)O[C@@H]1O[C@H](CO)[C@H]([C@@H]([C@H]1O)O)O	H0357	Ren Shen	人参	Ginseng	Panax ginseng
C0433	Taxifolin	CAS:480-18-2	CID:471	CHEMBL337309	C15H12O7	Oc1cc2OC(c3ccc(c(c3)O)O)C(C(=O)c2c(c1)O)O	H0140	Lian Zi	莲子	Hindu lotus seed	Nelumbo nucifera
C0450	Toluene	CAS:108-88-3	CID:1140	CHEMBL9113	C7H8	CC1=CC=CC=C1	H0357	Ren Shen	人参	Ginseng	Panax ginseng
C0450	Toluene	CAS:108-88-3	CID:1140	CHEMBL9113	C7H8	CC1=CC=CC=C1	H0104	Bai Zhu	白术	Largehead atractylodes	Atractylodes macrocephala
C0450	Toluene	CAS:108-88-3	CID:1140	CHEMBL9113	C7H8	CC1=CC=CC=C1	H0398	Sha Ren	砂仁	Villous amomum	Amomum villosum
C0453	Trans-Asarone	CAS:2883-98-9	CID:636822	CHEMBL333306	C12H16O3	C/C=C/c1cc(OC)c(cc1OC)OC	H0140	Lian Zi	莲子	Hindu lotus seed	Nelumbo nucifera
C0455	Trans-Phytol	CAS:150-86-7	CID:5280435	CHEMBL1644111	C20H40O	CC(C)CCCC(C)CCCC(C)CCCC(=CCO)C	H0357	Ren Shen	人参	Ginseng	Panax ginseng
C0455	Trans-Phytol	CAS:150-86-7	CID:5280435	CHEMBL1644111	C20H40O	CC(C)CCCC(C)CCCC(C)CCCC(=CCO)C	H0140	Lian Zi	莲子	Hindu lotus seed	Nelumbo nucifera
C0457	Tricin	CAS:520-32-1	CID:5281702	CHEMBL454320	C17H14O7	COC1=CC(=CC(=C1O)OC)C2=CC(=O)C3=C(C=C(C=C3O2)O)O	H0357	Ren Shen	人参	Ginseng	Panax ginseng
C0478	Vanillic Acid	CAS:121-34-6	CID:8468	CHEMBL120568	C8H8O4	COC1=C(C=CC(=C1)C(=O)O)O	H1053	Fu Ling	茯苓	Indian bread	Wolfiporia cocos
C0478	Vanillic Acid	CAS:121-34-6	CID:8468	CHEMBL120568	C8H8O4	COC1=C(C=CC(=C1)C(=O)O)O	H0140	Lian Zi	莲子	Hindu lotus seed	Nelumbo nucifera
C0478	Vanillic Acid	CAS:121-34-6	CID:8468	CHEMBL120568	C8H8O4	COC1=C(C=CC(=C1)C(=O)O)O	H0398	Sha Ren	砂仁	Villous amomum	Amomum villosum
C0479	Vanillin	CAS:121-33-5	CID:1183	CHEMBL13883	C8H8O3	COC1=C(C=CC(=C1)C=O)O	H0357	Ren Shen	人参	Ginseng	Panax ginseng
C0483	Vitexin	CAS:3681-93-4	CID:5280441	CHEMBL487417	C21H20O10	C1=CC(=CC=C1C2=CC(=O)C3=C(O2)C(=C(C=C3O)O)C4C(C(C(C(O4)CO)O)O)O)O	H0357	Ren Shen	人参	Ginseng	Panax ginseng
C0483	Vitexin	CAS:3681-93-4	CID:5280441	CHEMBL487417	C21H20O10	C1=CC(=CC=C1C2=CC(=O)C3=C(O2)C(=C(C=C3O)O)C4C(C(C(C(O4)CO)O)O)O)O	H0140	Lian Zi	莲子	Hindu lotus seed	Nelumbo nucifera
C0491	1-(4-Hydroxy-Benzyl)-1,2,3,4-Tetrahydro-Isoquinoline-6,7-Diol		CID:114840	CHEMBL19344	C16H17NO3	C1CNC(C2=CC(=C(C=C21)O)O)CC3=CC=C(C=C3)O	H0140	Lian Zi	莲子	Hindu lotus seed	Nelumbo nucifera
C0493	Licochalcone D	CAS:144506-15-0	CID:10473311	CHEMBL1644932	C21H22O5	COc1c(/C=C/C(=O)c2ccc(c(c2)CC=C(C)C)O)ccc(c1O)O	H1066	Gan Cao	甘草	Glycyrrhiza inflata	Glycyrrhiza uralensis
C0504	Limonene	CAS:138-86-3	CID:440917	CHEMBL449062	C10H16	CC1=CCC(CC1)C(=C)C	H0357	Ren Shen	人参	Ginseng	Panax ginseng
C0504	Limonene	CAS:138-86-3	CID:440917	CHEMBL449062	C10H16	CC1=CCC(CC1)C(=C)C	H0104	Bai Zhu	白术	Largehead atractylodes	Atractylodes macrocephala
C0504	Limonene	CAS:138-86-3	CID:440917	CHEMBL449062	C10H16	CC1=CCC(CC1)C(=C)C	H0398	Sha Ren	砂仁	Villous amomum	Amomum villosum
C0510	Phenylethyl Alcohol	CAS:60-12-8	CID:6054	CHEMBL448500	C8H10O	OCCc1ccccc1	H0104	Bai Zhu	白术	Largehead atractylodes	Atractylodes macrocephala
C0513	Squalene	CAS:111-02-4	CID:638072	CHEMBL458402	C30H50	C/C(=CCC/C=C(/CC/C=C(/CCC=C(C)C)C)C)/CC/C=C(/CCC=C(C)C)C	H0357	Ren Shen	人参	Ginseng	Panax ginseng
C0522	Falcarinol	CAS:21852-80-2	CID:5469789	CHEMBL368712	C17H24O	CCCCCCC/C=C\CC#CC#C[C@H](C=C)O	H0357	Ren Shen	人参	Ginseng	Panax ginseng
C0523	Terpineol		CID:11230	CHEMBL507795	C10H18O	CC1=CCC(CC1)(O)C(C)C	H0398	Sha Ren	砂仁	Villous amomum	Amomum villosum
C0524	Propionic Acid	CAS:79-09-4	CID:1032	CHEMBL14021	C3H6O2	CCC(=O)O	H0140	Lian Zi	莲子	Hindu lotus seed	Nelumbo nucifera
C0528	Alpha-Terpineol		CID:443162	CHEMBL447597	C10H18O	CC1=CCC(CC1)C(C)(C)O	H0140	Lian Zi	莲子	Hindu lotus seed	Nelumbo nucifera
C0528	Alpha-Terpineol		CID:443162	CHEMBL447597	C10H18O	CC1=CCC(CC1)C(C)(C)O	H0398	Sha Ren	砂仁	Villous amomum	Amomum villosum
C0532	Procyanidin B2	CAS:29106-49-8	CID:122738	CHEMBL38714	C30H26O12	C1C(C(OC2=C1C(=CC(=C2C3C(C(OC4=CC(=CC(=C34)O)O)C5=CC(=C(C=C5)O)O)O)O)O)C6=CC(=C(C=C6)O)O)O	H0140	Lian Zi	莲子	Hindu lotus seed	Nelumbo nucifera
C0534	Liriodenine	CAS:475-75-2	CID:10144	CHEMBL37736	C17H9NO3	O=C1c2ccccc2c2c3c1nccc3cc1c2OCO1	H0140	Lian Zi	莲子	Hindu lotus seed	Nelumbo nucifera
C0540	Cis-Asarone	CAS:5273-86-9	CID:5281758	CHEMBL477752	C12H16O3	CC=CC1=CC(=C(C=C1OC)OC)OC	H0140	Lian Zi	莲子	Hindu lotus seed	Nelumbo nucifera
C0547	Caryophyllene	CAS:87-44-5	CID:5281522	CHEMBL448700	C15H24	C/C/1=C/CCC(=C)[C@@H]2[C@@H](CC1)C(C2)(C)C	H0357	Ren Shen	人参	Ginseng	Panax ginseng
C0547	Caryophyllene	CAS:87-44-5	CID:5281522	CHEMBL448700	C15H24	C/C/1=C/CCC(=C)[C@@H]2[C@@H](CC1)C(C2)(C)C	H0398	Sha Ren	砂仁	Villous amomum	Amomum villosum
C0548	Alpha-Humulone		CID:5281520	CHEMBL251280	C15H24	CC1=CCC(C=CCC(=CCC1)C)(C)C	H0357	Ren Shen	人参	Ginseng	Panax ginseng
C0548	Alpha-Humulone		CID:5281520	CHEMBL251280	C15H24	CC1=CCC(C=CCC(=CCC1)C)(C)C	H0104	Bai Zhu	白术	Largehead atractylodes	Atractylodes macrocephala
C0548	Alpha-Humulone		CID:5281520	CHEMBL251280	C15H24	CC1=CCC(C=CCC(=CCC1)C)(C)C	H0398	Sha Ren	砂仁	Villous amomum	Amomum villosum
C0557	Inositol		CID:892	CHEMBL1222251	C6H12O6	C1(C(C(C(C(C1O)O)O)O)O)O	H0971	Bai Bian Dou	白扁豆	White hyacinth bean	Lablab purpureus
C0559	Pyruvic Acid	CAS:127-17-3	CID:1060	CHEMBL1162144	C3H4O3	CC(=O)C(=O)[O-]	H0357	Ren Shen	人参	Ginseng	Panax ginseng
C0568	Fructose	CAS:57-48-7	CID:5984		C6H12O6	OC[C@H]([C@H]([C@@H](C(=O)CO)O)O)O	H0104	Bai Zhu	白术	Largehead atractylodes	Atractylodes macrocephala
C0568	Fructose	CAS:57-48-7	CID:5984		C6H12O6	OC[C@H]([C@H]([C@@H](C(=O)CO)O)O)O	H0417	Shan Yao	山药	Common yam	Dioscorea batatas
C0569	Sucrose	CAS:57-50-1	CID:5988	CHEMBL253582	C12H22O11	OC[C@H]1O[C@@]([C@H]([C@@H]1O)O)(CO)O[C@H]1O[C@H](CO)[C@H]([C@@H]([C@H]1O)O)O	H0357	Ren Shen	人参	Ginseng	Panax ginseng
C0569	Sucrose	CAS:57-50-1	CID:5988	CHEMBL253582	C12H22O11	OC[C@H]1O[C@@]([C@H]([C@@H]1O)O)(CO)O[C@H]1O[C@H](CO)[C@H]([C@@H]([C@H]1O)O)O	H0971	Bai Bian Dou	白扁豆	White hyacinth bean	Lablab purpureus
C0570	Galactose	CAS:59-23-4	CID:6036	CHEMBL195923	C6H12O6	OC[C@H]1OC(O)[C@@H]([C@H]([C@H]1O)O)O	H0417	Shan Yao	山药	Common yam	Dioscorea batatas
C0574	Maltose	CAS:69-79-4	CID:6255	CHEMBL1908365	C12H22O11	OC[C@H]1O[C@@H](O)[C@@H]([C@H]([C@@H]1O[C@H]1O[C@H](CO)[C@H]([C@@H]([C@H]1O)O)O)O)O	H0971	Bai Bian Dou	白扁豆	White hyacinth bean	Lablab purpureus
C0586	Nuciferine	CAS:475-83-2	CID:10146	CHEMBL464529	C19H21NO2	COc1cc2CC[NH+]([C@H]3c2c(c1OC)c1ccccc1C3)C	H0140	Lian Zi	莲子	Hindu lotus seed	Nelumbo nucifera
C0596	Tetradecane		CID:12389	CHEMBL135488	C14H30	CCCCCCCCCCCCCC	H0357	Ren Shen	人参	Ginseng	Panax ginseng
C0597	Heptadecane		CID:12398	CHEMBL3185332	C17H36	CCCCCCCCCCCCCCCCC	H0357	Ren Shen	人参	Ginseng	Panax ginseng
C0601	Fructose	CAS:57-48-7	CID:24310		C6H12O6	OC[C@@]1(O)OC[C@H]([C@H]([C@@H]1O)O)O	H0357	Ren Shen	人参	Ginseng	Panax ginseng
C0602	2,3,9,10-Tetramethoxy-6,8,13,13A-Tetrahydro-5H-Isoquinolino[2,1-B]Isoquinoline	CAS:2934-97-6	CID:5417	CHEMBL187892	C21H25NO4	COc1cc2CCN3C(c2cc1OC)Cc1c(C3)c(OC)c(cc1)OC	H1066	Gan Cao	甘草	Glycyrrhiza inflata	Glycyrrhiza uralensis
C0603	3,7,7-Trimethylbicyclo[4.1.0]Hept-3-Ene,3-Carene		CID:26049	CHEMBL506854	C10H16	CC1=CCC2C(C1)C2(C)C	H0398	Sha Ren	砂仁	Villous amomum	Amomum villosum
C0652	Uralsaponin A	CAS:103000-77-7	CID:128229		C42H62O16	O[C@@H]1[C@@H](O[C@@H]2O[C@H](C(=O)[O-])[C@H]([C@@H]([C@H]2O)O)O)[C@@H](O[C@@H]([C@H]1O)C(=O)[O-])O[C@H]1CC[C@]2([C@H](C1(C)C)CC[C@@]1([C@@H]2C(=O)C=C2[C@@]1(C)CC[C@@]1([C@H]2C[C@](C)(CC1)C(=O)[O-])C)C)C	H1066	Gan Cao	甘草	Glycyrrhiza inflata	Glycyrrhiza uralensis
C0662	Anonaine	CAS:1862-41-5	CID:160597	CHEMBL401798	C17H15NO2	C1CNC2CC3=CC=CC=C3C4=C2C1=CC5=C4OCO5	H0140	Lian Zi	莲子	Hindu lotus seed	Nelumbo nucifera
C0663	Liensinine	CAS:2586-96-1	CID:160644		C37H42N2O6	COc1cc2CC[NH+]([C@@H](c2cc1Oc1cc(ccc1O)C[C@H]1[NH+](C)CCc2c1cc(OC)c(c2)OC)Cc1ccc(cc1)O)C	H0140	Lian Zi	莲子	Hindu lotus seed	Nelumbo nucifera
C0668	Platycodin D	CAS:58479-68-8	CID:162859	CHEMBL1641859	C57H92O28	CC1C(C(C(C(O1)OC2C(C(COC2OC(=O)C34CCC(CC3C5=CCC6C(C5(CC4O)C)(CCC7C6(CC(C(C7(CO)CO)OC8C(C(C(C(O8)CO)O)O)O)O)C)C)(C)C)O)O)O)O)OC9C(C(C(CO9)O)OC1C(C(CO1)(CO)O)O)O	H0036	Jie Geng	桔梗	Balloonflower	Platycodon grandiflorum
C0679	Mannose	CAS:3458-28-4	CID:185698	CHEMBL365590	C6H12O6	OC[C@H]1O[C@H](O)[C@H]([C@H]([C@@H]1O)O)O	H0357	Ren Shen	人参	Ginseng	Panax ginseng
C0681	Pronuciferine	CAS:2128-60-1	CID:200480	CHEMBL237766	C19H21NO3	COc1c(OC)cc2c3c1C1(C=CC(=O)C=C1)C[C@H]3[NH+](CC2)C	H0140	Lian Zi	莲子	Hindu lotus seed	Nelumbo nucifera
C0683	Guaiol	CAS:489-86-1	CID:227829	CHEMBL226915	C15H26O	C[C@H]1CC[C@H](CC2=C1CC[C@@H]2C)C(O)(C)C	H0398	Sha Ren	砂仁	Villous amomum	Amomum villosum
C0693	Maltose	CAS:69-79-4	CID:439341		C12H22O11	OC[C@H]1O[C@H](O)[C@@H]([C@H]([C@@H]1O[C@H]1O[C@H](CO)[C@H]([C@@H]([C@H]1O)O)O)O)O	H0357	Ren Shen	人参	Ginseng	Panax ginseng
C0698	Ginsenoside Re	CAS:52286-59-6	CID:441921	CHEMBL510095	C48H82O18	OC[C@H]1O[C@@H](O[C@H]2C[C@]3(C)[C@@H]([C@@]4([C@@H]2C(C)(C)[C@@H](O)CC4)C)C[C@H]([C@H]2[C@@]3(C)CC[C@@H]2[C@@](O[C@@H]2O[C@H](CO)[C@H]([C@@H]([C@H]2O)O)O)(CCC=C(C)C)C)O)[C@@H]([C@H]([C@@H]1O)O)O[C@@H]1O[C@@H](C)[C@@H]([C@H]([C@H]1O)O)O	H0357	Ren Shen	人参	Ginseng	Panax ginseng
C0700	Ginsenoside Rg1	CAS:22427-39-0	CID:441923	CHEMBL501637	C42H72O14	CC(=CCCC(C)(C1CCC2(C1C(CC3C2(CC(C4C3(CCC(C4(C)C)O)C)OC5C(C(C(C(O5)CO)O)O)O)C)O)C)OC6C(C(C(C(O6)CO)O)O)O)C	H0357	Ren Shen	人参	Ginseng	Panax ginseng
C0709	2-Nonenal		CID:5283335	CHEMBL450072	C9H16O	CCCCCCC=CC=O	H0357	Ren Shen	人参	Ginseng	Panax ginseng
C0719	Borneol	CAS:507-70-0	CID:1201518	CHEMBL3186705	C10H18O	O[C@@H]1C[C@H]2C([C@]1(C)CC2)(C)C	H0398	Sha Ren	砂仁	Villous amomum	Amomum villosum
C0737	Abscisic Acid	CAS:21293-29-8	CID:5280896	CHEMBL288040	C15H20O4	[O-]C(=O)/C=C(\C=C\[C@@]1(O)C(=CC(=O)CC1(C)C)C)/C	H0417	Shan Yao	山药	Common yam	Dioscorea batatas
C0749	Stigmasterol	CAS:83-48-7	CID:5281330	CHEMBL400247	C29H48O	CC[C@H](C(C)C)/C=C/[C@H]([C@H]1CC[C@@H]2[C@]1(C)CC[C@H]1[C@H]2CC=C2[C@]1(C)CC[C@@H](C2)O)C	H0357	Ren Shen	人参	Ginseng	Panax ginseng
C0749	Stigmasterol	CAS:83-48-7	CID:5281330	CHEMBL400247	C29H48O	CC[C@H](C(C)C)/C=C/[C@H]([C@H]1CC[C@@H]2[C@]1(C)CC[C@H]1[C@H]2CC=C2[C@]1(C)CC[C@@H](C2)O)C	H0417	Shan Yao	山药	Common yam	Dioscorea batatas
C0750	Α-Spinasterol	CAS:481-18-5	CID:5281331		C29H48O	CC[C@@H](C(C)C)/C=C/[C@H]([C@H]1CC[C@@H]2[C@]1(C)CC[C@H]1C2=CC[C@@H]2[C@]1(C)CC[C@@H](C2)O)C	H0036	Jie Geng	桔梗	Balloonflower	Platycodon grandiflorum
C0752	(1R,9S)-4,11,11-Trimethyl-8-Methylenebicyclo[7.2.0]Undec-4-Ene,Caryophellene,Β-Caryophyllene		CID:5281515	CHEMBL445740	C15H24	CC1=CCCC(=C)C2CC(C2CC1)(C)C	H0357	Ren Shen	人参	Ginseng	Panax ginseng
C0752	(1R,9S)-4,11,11-Trimethyl-8-Methylenebicyclo[7.2.0]Undec-4-Ene,Caryophellene,Β-Caryophyllene		CID:5281515	CHEMBL445740	C15H24	CC1=CCCC(=C)C2CC(C2CC1)(C)C	H0398	Sha Ren	砂仁	Villous amomum	Amomum villosum
C0766	Glycycoumarin	CAS:94805-82-0	CID:5317756	CHEMBL1223642	C21H20O6	COc1c(CC=C(C)C)c(O)cc2c1cc(c(=O)o2)c1ccc(cc1O)O	H1066	Gan Cao	甘草	Glycyrrhiza inflata	Glycyrrhiza uralensis
C0769	Isotrifoliol	CAS:329319-08-6	CID:5318679		C16H10O6	COc1cc(O)cc2c1c1oc3c(c1c(=O)o2)ccc(c3)O	H1066	Gan Cao	甘草	Glycyrrhiza inflata	Glycyrrhiza uralensis
C0771	4,7,7-Trimethylbicyclo[2.2.1]Heptan-3-One		CID:2537	CHEMBL15768	C10H16O	CC1(C2CCC1(C(=O)C2)C)C	H0398	Sha Ren	砂仁	Villous amomum	Amomum villosum
C0776	Atractylenolide I	CAS:73069-13-3	CID:5321018	CHEMBL449520	C15H18O2	CC1=C2CC3C(=C)CCCC3(C=C2OC1=O)C	H0104	Bai Zhu	白术	Largehead atractylodes	Atractylodes macrocephala
C0790	Pachymic Acid	CAS:29070-92-6	CID:5484385	CHEMBL468034	C33H52O5	CC(C)C(=C)CCC(C1C(CC2(C1(CCC3=C2CCC4C3(CCC(C4(C)C)OC(=O)C)C)C)C)O)C(=O)O	H1053	Fu Ling	茯苓	Indian bread	Wolfiporia cocos
C0802	Ginsenoside Rb2	CAS:11021-13-9	CID:6917976	CHEMBL449303	C53H90O22	OC[C@H]1O[C@@H](O[C@H]2CC[C@]3([C@H](C2(C)C)CC[C@@]2([C@@H]3C[C@@H](O)[C@H]3[C@@]2(C)CC[C@@H]3[C@@](O[C@@H]2O[C@H](CO[C@@H]3OC[C@@H]([C@@H]([C@H]3O)O)O)[C@H]([C@@H]([C@H]2O)O)O)(CCC=C(C)C)C)C)C)[C@@H]([C@H]([C@@H]1O)O)O[C@@H]1O[C@H](CO)[C@H]([C@@H]([C@H]1O)O)O	H0357	Ren Shen	人参	Ginseng	Panax ginseng
C0805	Bornyl Acetate	CAS:76-49-3	CID:6950274		C12H20O2	CC(=O)O[C@H]1C[C@@H]2C([C@@]1(C)CC2)(C)C	H0398	Sha Ren	砂仁	Villous amomum	Amomum villosum
C0808	5,7-Dihydroxy-2-(4-Hydroxyphenyl)-2,3-Dihydrochromen-4-One		CID:932	CHEMBL32571	C15H12O5	C1C(OC2=CC(=CC(=C2C1=O)O)O)C3=CC=C(C=C3)O	H1066	Gan Cao	甘草	Glycyrrhiza inflata	Glycyrrhiza uralensis
C0810	Ginsenoside Rb1	CAS:41753-43-9	CID:9898279	CHEMBL501515	C54H92O23	OC[C@H]1O[C@@H](O[C@H]2CC[C@]3([C@H](C2(C)C)CC[C@@]2([C@@H]3C[C@@H](O)[C@H]3[C@@]2(C)CC[C@@H]3[C@@](O[C@@H]2O[C@H](CO[C@@H]3O[C@H](CO)[C@H]([C@@H]([C@H]3O)O)O)[C@H]([C@@H]([C@H]2O)O)O)(CCC=C(C)C)C)C)C)[C@@H]([C@H]([C@@H]1O)O)O[C@@H]1O[C@H](CO)[C@H]([C@@H]([C@H]1O)O)O	H0357	Ren Shen	人参	Ginseng	Panax ginseng
C0812	Araloside A	CAS:7518-22-1	CID:10079497	CHEMBL1773982	C47H74O18	OC[C@@H]1O[C@H]([C@@H]([C@H]1O)O)O[C@@H]1[C@H](O[C@H]([C@@H]([C@H]1O)O)O[C@H]1CC[C@]2([C@H](C1(C)C)CC[C@@]1([C@@H]2CC=C2[C@@]1(C)CC[C@@]1([C@H]2CC(C)(C)CC1)C(=O)O[C@@H]1O[C@H](CO)[C@H]([C@@H]([C@H]1O)O)O)C)C)C(=O)[O-]	H0357	Ren Shen	人参	Ginseng	Panax ginseng
C0813	(20S)-Protopanaxadiol	CAS:30636-90-9	CID:11213350	CHEMBL375563	C30H52O3	CC(=CCCC(C)(C1CCC2(C1C(CC3C2(CCC4C3(CCC(C4(C)C)O)C)C)O)C)O)C	H0357	Ren Shen	人参	Ginseng	Panax ginseng
C0815	5-Hydroxy-3-(4-Hydroxyphenyl)-7-[3,4,5-Trihydroxy-6-(Hydroxymethyl)Oxan-2-Yl]Oxychromen-4-One		CID:5284639	CHEMBL1364260	C21H20O10	C1=CC(=CC=C1C2=COC3=CC(=CC(=C3C2=O)O)OC4C(C(C(C(O4)CO)O)O)O)O	H0398	Sha Ren	砂仁	Villous amomum	Amomum villosum
C0823	Ginsenoside Rd	CAS:52705-93-8	CID:11679800	CHEMBL473659	C48H82O18	OC[C@H]1O[C@@H](O[C@H]2CC[C@]3([C@H](C2(C)C)CC[C@@]2([C@@H]3C[C@@H](O)[C@H]3[C@@]2(C)CC[C@@H]3[C@@](O[C@@H]2O[C@H](CO)[C@H]([C@@H]([C@H]2O)O)O)(CCC=C(C)C)C)C)C)[C@@H]([C@H]([C@@H]1O)O)O[C@@H]1O[C@H](CO)[C@H]([C@@H]([C@H]1O)O)O	H0357	Ren Shen	人参	Ginseng	Panax ginseng
C0834	Tumulosic Acid	CAS:508-24-7	CID:12314446	CHEMBL461484	C31H50O4	CC(C(=C)CC[C@H]([C@H]1[C@H](O)C[C@@]2([C@]1(C)CCC1=C2CC[C@@H]2[C@]1(C)CC[C@@H](C2(C)C)O)C)C(=O)[O-])C	H1053	Fu Ling	茯苓	Indian bread	Wolfiporia cocos
C0836	8-Prenylapigenin	CAS:72357-31-4	CID:10246505	CHEMBL371562	C20H18O5	CC(=CCc1c(O)cc(c2c1oc(cc2=O)c1ccc(cc1)O)O)C	H1066	Gan Cao	甘草	Glycyrrhiza inflata	Glycyrrhiza uralensis
C0838	8-Prenylnaringenin	CAS:53846-50-7	CID:480764	CHEMBL376915	C20H20O5	CC(=CCc1c(O)cc(c2c1O[C@@H](CC2=O)c1ccc(cc1)O)O)C	H1066	Gan Cao	甘草	Glycyrrhiza inflata	Glycyrrhiza uralensis
C0839	(2E,4E)-Deca-2,4-Dienal	CAS:25152-84-5	CID:5283349	CHEMBL443949	C10H16O	CCCCCC=CC=CC=O	H0357	Ren Shen	人参	Ginseng	Panax ginseng
C0839	(2E,4E)-Deca-2,4-Dienal	CAS:25152-84-5	CID:5283349	CHEMBL443949	C10H16O	CCCCCC=CC=CC=O	H0104	Bai Zhu	白术	Largehead atractylodes	Atractylodes macrocephala
C0849	Raffinose		CID:14211700		C18H18O7	COc1cc2O[C@H]3COc4c([C@@]3([C@@H](c2c(c1C)O)O)O)cccc4O	H0971	Bai Bian Dou	白扁豆	White hyacinth bean	Lablab purpureus
C0851	Acetophenone	CAS:98-86-2	CID:7410	CHEMBL274467	C8H8O	CC(=O)c1ccccc1	H0104	Bai Zhu	白术	Largehead atractylodes	Atractylodes macrocephala
C0852	Adenosine Triphosphate		CID:14308007		C10H16N5O13P3	O[C@H]1[C@H](COP(=O)(OP(=O)(OP(=O)([O-])[O-])[O-])[O-])O[C@@H]([C@H]1O)n1cnc2c1ncnc2N	H0357	Ren Shen	人参	Ginseng	Panax ginseng
C0863	Adenine	CAS:73-24-5	CID:190	CHEMBL226345	C5H5N5	C1=NC2=NC=NC(=C2N1)N	H0357	Ren Shen	人参	Ginseng	Panax ginseng
C0863	Adenine	CAS:73-24-5	CID:190	CHEMBL226345	C5H5N5	C1=NC2=NC=NC(=C2N1)N	H1053	Fu Ling	茯苓	Indian bread	Wolfiporia cocos
C0863	Adenine	CAS:73-24-5	CID:190	CHEMBL226345	C5H5N5	C1=NC2=NC=NC(=C2N1)N	H0140	Lian Zi	莲子	Hindu lotus seed	Nelumbo nucifera
C0867	Alcohol		CID:702	CHEMBL545	C2H6O	CCO	H0357	Ren Shen	人参	Ginseng	Panax ginseng
C0897	Anacardic Acid		CID:167551	CHEMBL33778	C22H36O3	CCCCCCCCCCCCCCCc1cccc(c1C(=O)O)O	H0140	Lian Zi	莲子	Hindu lotus seed	Nelumbo nucifera
C0899	Andrographolide	CAS:5508-58-7	CID:5318517	CHEMBL186141	C20H30O5	CC12CCC(C(C1CCC(=C)C2CC=C3C(COC3=O)O)(C)CO)O	H0140	Lian Zi	莲子	Hindu lotus seed	Nelumbo nucifera
C0905	Anethole	CAS:104-46-1	CID:637563	CHEMBL452630	C10H12O	CC=CC1=CC=C(C=C1)OC	H1066	Gan Cao	甘草	Glycyrrhiza inflata	Glycyrrhiza uralensis
C0914	Apigenin	CAS:520-36-5	CID:5280443	CHEMBL28	C15H10O5	C1=CC(=CC=C1C2=CC(=O)C3=C(C=C(C=C3O2)O)O)O	H1066	Gan Cao	甘草	Glycyrrhiza inflata	Glycyrrhiza uralensis
C0918	Arbutin	CAS:497-76-7	CID:440936	CHEMBL232202	C12H16O7	OC[C@H]1O[C@@H](Oc2ccc(cc2)O)[C@@H]([C@H]([C@@H]1O)O)O	H0140	Lian Zi	莲子	Hindu lotus seed	Nelumbo nucifera
C0932	Ginsenoside Rg2	CAS:52286-74-5	CID:124893126		C42H72O13	OC[C@H]1O[C@@H](O[C@H]2C[C@]3(C)[C@@H]([C@@]4([C@@H]2C(C)(C)[C@@H](O)CC4)C)C[C@H]([C@H]2[C@@]3(C)CC[C@H]2[C@](CCC=C(C)C)(O)C)O)[C@@H]([C@H]([C@@H]1O)O)O[C@@H]1O[C@@H](C)[C@@H]([C@H]([C@H]1O)O)O	H0357	Ren Shen	人参	Ginseng	Panax ginseng
C0935	Astragalin	CAS:480-10-4	CID:5282102	CHEMBL233930	C21H20O11	OC[C@H]1O[C@@H](Oc2c(oc3c(c2=O)c(O)cc(c3)O)c2ccc(cc2)O)[C@@H]([C@H]([C@@H]1O)O)O	H0104	Bai Zhu	白术	Largehead atractylodes	Atractylodes macrocephala
C0935	Astragalin	CAS:480-10-4	CID:5282102	CHEMBL233930	C21H20O11	OC[C@H]1O[C@@H](Oc2c(oc3c(c2=O)c(O)cc(c3)O)c2ccc(cc2)O)[C@@H]([C@H]([C@@H]1O)O)O	H0140	Lian Zi	莲子	Hindu lotus seed	Nelumbo nucifera
C0935	Astragalin	CAS:480-10-4	CID:5282102	CHEMBL233930	C21H20O11	OC[C@H]1O[C@@H](Oc2c(oc3c(c2=O)c(O)cc(c3)O)c2ccc(cc2)O)[C@@H]([C@H]([C@@H]1O)O)O	H1066	Gan Cao	甘草	Glycyrrhiza inflata	Glycyrrhiza uralensis
C1162	Benzaldehyde		CID:240	CHEMBL15972	C7H6O	O=Cc1ccccc1	H0357	Ren Shen	人参	Ginseng	Panax ginseng
C1176	Besigomsin	CAS:58546-54-6	CID:3001662	CHEMBL403578	C23H28O7	COc1cc2C[C@](C)(O)[C@@H](C)Cc3c(c2c(c1OC)OC)c(OC)c1c(c3)OCO1	H0357	Ren Shen	人参	Ginseng	Panax ginseng
C1178	Beta-Sitosterol		CID:222284	CHEMBL221542	C29H50O	CCC(CCC(C)C1CCC2C1(CCC3C2CC=C4C3(CCC(C4)O)C)C)C(C)C	H0357	Ren Shen	人参	Ginseng	Panax ginseng
C1178	Beta-Sitosterol		CID:222284	CHEMBL221542	C29H50O	CCC(CCC(C)C1CCC2C1(CCC3C2CC=C4C3(CCC(C4)O)C)C)C(C)C	H0104	Bai Zhu	白术	Largehead atractylodes	Atractylodes macrocephala
C1178	Beta-Sitosterol		CID:222284	CHEMBL221542	C29H50O	CCC(CCC(C)C1CCC2C1(CCC3C2CC=C4C3(CCC(C4)O)C)C)C(C)C	H0140	Lian Zi	莲子	Hindu lotus seed	Nelumbo nucifera
C1178	Beta-Sitosterol		CID:222284	CHEMBL221542	C29H50O	CCC(CCC(C)C1CCC2C1(CCC3C2CC=C4C3(CCC(C4)O)C)C)C(C)C	H1066	Gan Cao	甘草	Glycyrrhiza inflata	Glycyrrhiza uralensis
C1178	Beta-Sitosterol		CID:222284	CHEMBL221542	C29H50O	CCC(CCC(C)C1CCC2C1(CCC3C2CC=C4C3(CCC(C4)O)C)C)C(C)C	H0398	Sha Ren	砂仁	Villous amomum	Amomum villosum
C1180	Betulinic Acid	CAS:472-15-1	CID:64971	CHEMBL269277	C30H48O3	CC(=C)[C@@H]1CC[C@]2([C@H]1[C@H]1CC[C@H]3[C@@]([C@]1(C)CC2)(C)CC[C@@H]1[C@]3(C)CC[C@@H](C1(C)C)O)C(=O)O	H0140	Lian Zi	莲子	Hindu lotus seed	Nelumbo nucifera
C1190	Biphenyl	CAS:92-52-4	CID:7095	CHEMBL14092	C12H10	c1ccc(cc1)c1ccccc1	H0104	Bai Zhu	白术	Largehead atractylodes	Atractylodes macrocephala
C1193	Bisphenol A	CAS:80-05-7	CID:6623	CHEMBL418971	C15H16O2	CC(c1ccc(cc1)O)(c1ccc(cc1)O)C	H0357	Ren Shen	人参	Ginseng	Panax ginseng
C1201	Butylated Hydroxytoluene	CAS:128-37-0	CID:31404	CHEMBL146	C15H24O	CC1=CC(=C(C(=C1)C(C)(C)C)O)C(C)(C)C	H0357	Ren Shen	人参	Ginseng	Panax ginseng
C1201	Butylated Hydroxytoluene	CAS:128-37-0	CID:31404	CHEMBL146	C15H24O	CC1=CC(=C(C(=C1)C(C)(C)C)O)C(C)(C)C	H0104	Bai Zhu	白术	Largehead atractylodes	Atractylodes macrocephala
C1203	Caffeic Acid	CAS:331-39-5	CID:689043	CHEMBL145	C9H8O4	C1=CC(=C(C=C1C=CC(=O)O)O)O	H0357	Ren Shen	人参	Ginseng	Panax ginseng
C1203	Caffeic Acid	CAS:331-39-5	CID:689043	CHEMBL145	C9H8O4	C1=CC(=C(C=C1C=CC(=O)O)O)O	H0140	Lian Zi	莲子	Hindu lotus seed	Nelumbo nucifera
C1208	Calycosin	CAS:20575-57-9	CID:5280448	CHEMBL241608	C16H12O5	COc1ccc(cc1O)c1coc2c(c1=O)ccc(c2)O	H1066	Gan Cao	甘草	Glycyrrhiza inflata	Glycyrrhiza uralensis
C1209	Camphor	CAS:76-22-2	CID:159055	CHEMBL504760	C10H16O	O=C1C[C@@H]2C([C@@]1(C)CC2)(C)C	H0398	Sha Ren	砂仁	Villous amomum	Amomum villosum
C1220	Catechin		CID:1203	CHEMBL206452	C15H14O6	C1C(C(OC2=CC(=CC(=C21)O)O)C3=CC(=C(C=C3)O)O)O	H1053	Fu Ling	茯苓	Indian bread	Wolfiporia cocos
C1220	Catechin		CID:1203	CHEMBL206452	C15H14O6	C1C(C(OC2=CC(=CC(=C21)O)O)C3=CC(=C(C=C3)O)O)O	H0140	Lian Zi	莲子	Hindu lotus seed	Nelumbo nucifera
C1221	Catechol	CAS:120-80-9	CID:289	CHEMBL280998	C6H6O2	C1=CC=C(C(=C1)O)O	H0140	Lian Zi	莲子	Hindu lotus seed	Nelumbo nucifera
C1231	Chlorogenic Acid	CAS:327-97-9	CID:1794427	CHEMBL284616	C16H18O9	C1C(C(C(CC1(C(=O)O)O)OC(=O)C=CC2=CC(=C(C=C2)O)O)O)O	H0140	Lian Zi	莲子	Hindu lotus seed	Nelumbo nucifera
C1239	Chrysoeriol	CAS:491-71-4	CID:5280666	CHEMBL214321	C16H12O6	COc1cc(ccc1O)c1cc(=O)c2c(o1)cc(cc2O)O	H1066	Gan Cao	甘草	Glycyrrhiza inflata	Glycyrrhiza uralensis
C1241	Cianidanol		CID:9064	CHEMBL311498	C15H14O6	C1C(C(OC2=CC(=CC(=C21)O)O)C3=CC(=C(C=C3)O)O)O	H0140	Lian Zi	莲子	Hindu lotus seed	Nelumbo nucifera
C1243	Cinnamic Acid	CAS:621-82-9	CID:444539	CHEMBL27246	C9H8O2	C1=CC=C(C=C1)C=CC(=O)O	H0140	Lian Zi	莲子	Hindu lotus seed	Nelumbo nucifera
C1243	Cinnamic Acid	CAS:621-82-9	CID:444539	CHEMBL27246	C9H8O2	C1=CC=C(C=C1)C=CC(=O)O	H1066	Gan Cao	甘草	Glycyrrhiza inflata	Glycyrrhiza uralensis
C1244	Ciprofloxacin	CAS:85721-33-1	CID:2764	CHEMBL8	C17H18FN3O3	Fc1cc2c(cc1N1CCNCC1)n(cc(c2=O)C(=O)O)C1CC1	H0739	Yi Yi Ren	薏苡仁	Jobstears seed	Coix lacryma- jobi var. ma - yuen
C1246	Citric Acid	CAS:77-92-9	CID:311	CHEMBL1261	C6H8O7	C(C(=O)O)C(CC(=O)O)(C(=O)O)O	H0357	Ren Shen	人参	Ginseng	Panax ginseng
C1258	Coumaric Acid	CAS:25429-38-3	CID:637542	CHEMBL66879	C9H8O3	C1=CC(=CC=C1C=CC(=O)O)O	H0140	Lian Zi	莲子	Hindu lotus seed	Nelumbo nucifera
C1259	Coumarin	CAS:91-64-5	CID:323	CHEMBL6466	C9H6O2	C1=CC=C2C(=C1)C=CC(=O)O2	H1066	Gan Cao	甘草	Glycyrrhiza inflata	Glycyrrhiza uralensis
C1270	Cyclohexanone		CID:7967	CHEMBL18850	C6H10O	O=C1CCCCC1	H0140	Lian Zi	莲子	Hindu lotus seed	Nelumbo nucifera
C1278	Daidzein	CAS:486-66-8	CID:5281708	CHEMBL8145	C15H10O4	C1=CC(=CC=C1C2=COC3=C(C2=O)C=CC(=C3)O)O	H1066	Gan Cao	甘草	Glycyrrhiza inflata	Glycyrrhiza uralensis
